# Supplementary material
Source: PubMed Central journal article supplement (PMC5875318)

## Supplementary Online Content

Wu X, Malhotra A, Geng B, et al. Cost-effectiveness of magnetic resonance imaging in cervical clearance of obtunded blunt trauma after a normal computed tomographic finding. *JAMA Surgery*. Published online March 14, 2018. doi:10.1001/jamasurg.2018.0099

**eFigure 1.** Sensitivity Analysis Varying the Risk of Ventilator-Associated Pneumonia

**eFigure 2.** Sensitivity Analysis Varying the Risk of Secondary Brain Injury

This supplementary material has been provided by the authors to give readers additional information about their work.

**eFigure 1.** Sensitivity Analysis Varying the Risk of Ventilator-Associated Pneumonia

NFU remains the optimal strategy throughout the range.

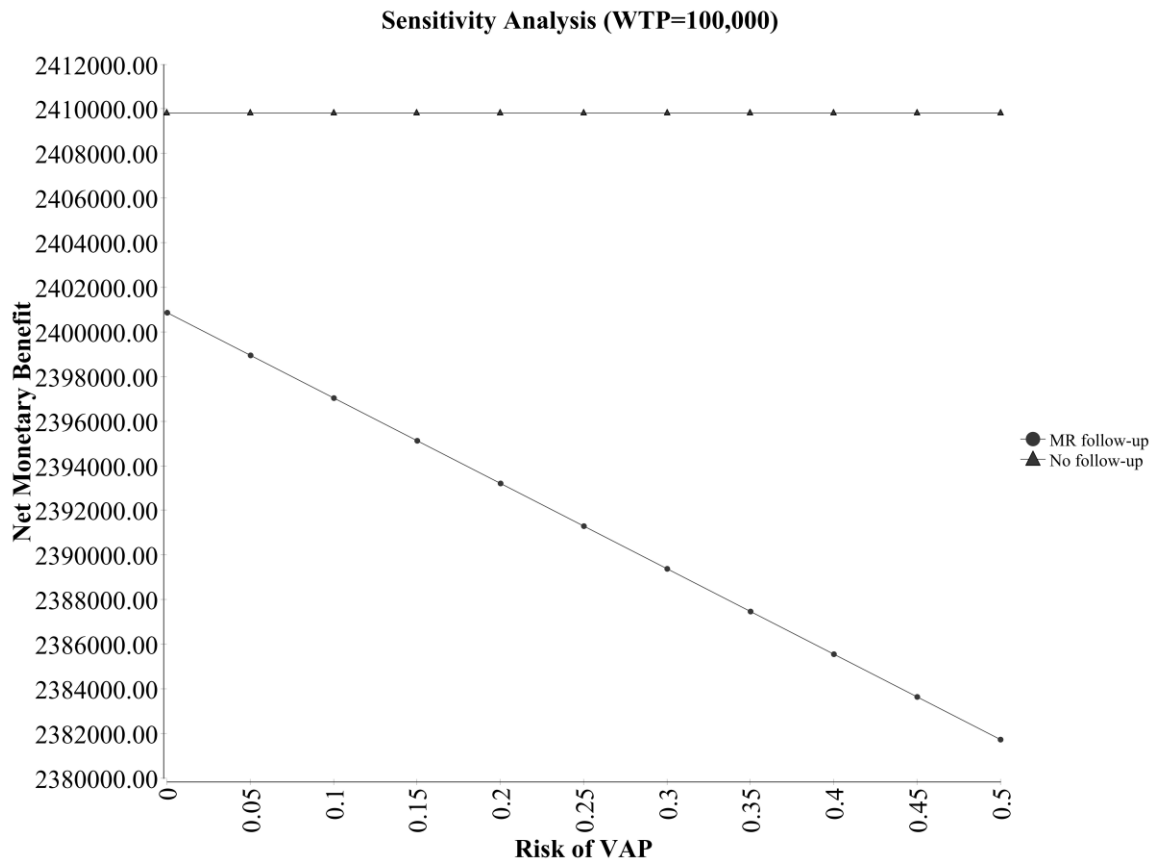

**eFigure 2. Sensitivity Analysis Varying the Risk of Secondary Brain Injury**

NFU remains the optimal strategy throughout the range.

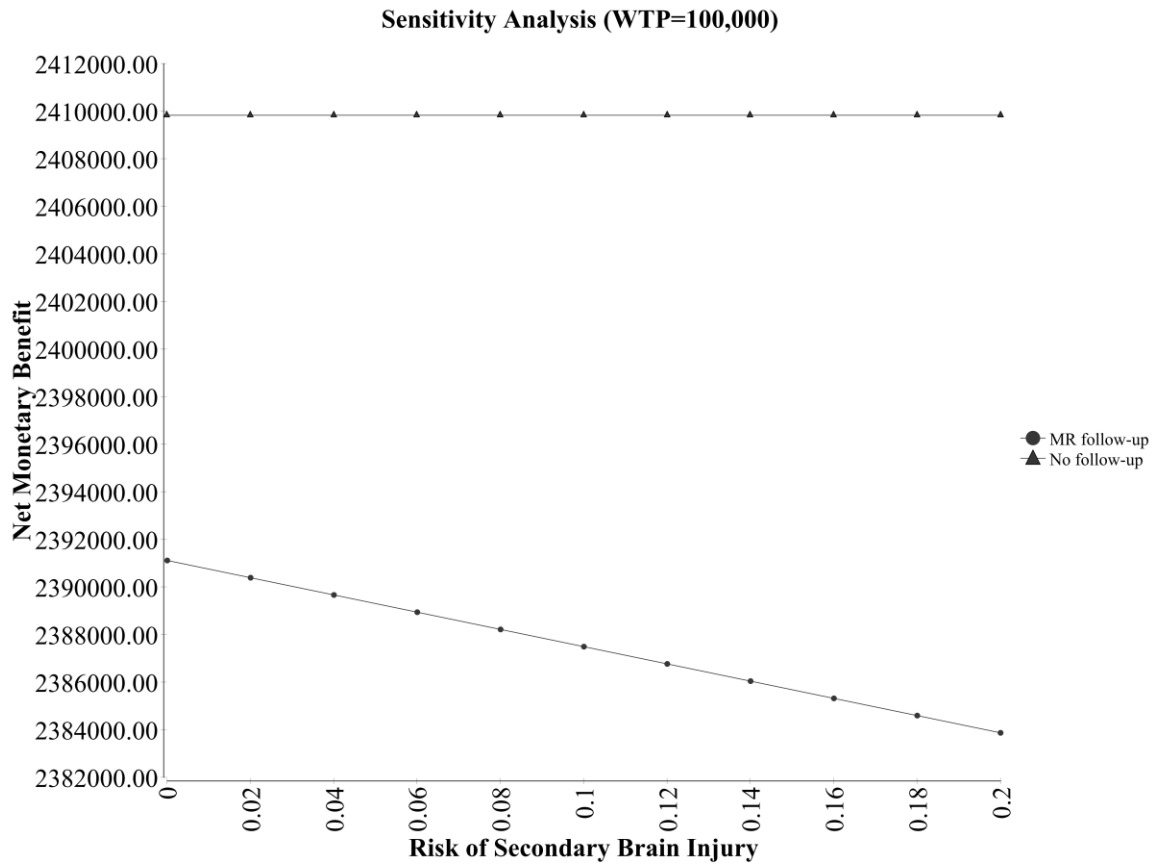

Supplement: jamasurg-153-625-s001.pdf [file jamasurg-153-625-s001.pdf]
